# Supplementary material
Source: publisher figshare collection journal article supplement (https://asha.figshare.com/ndownloader/files/26220662)

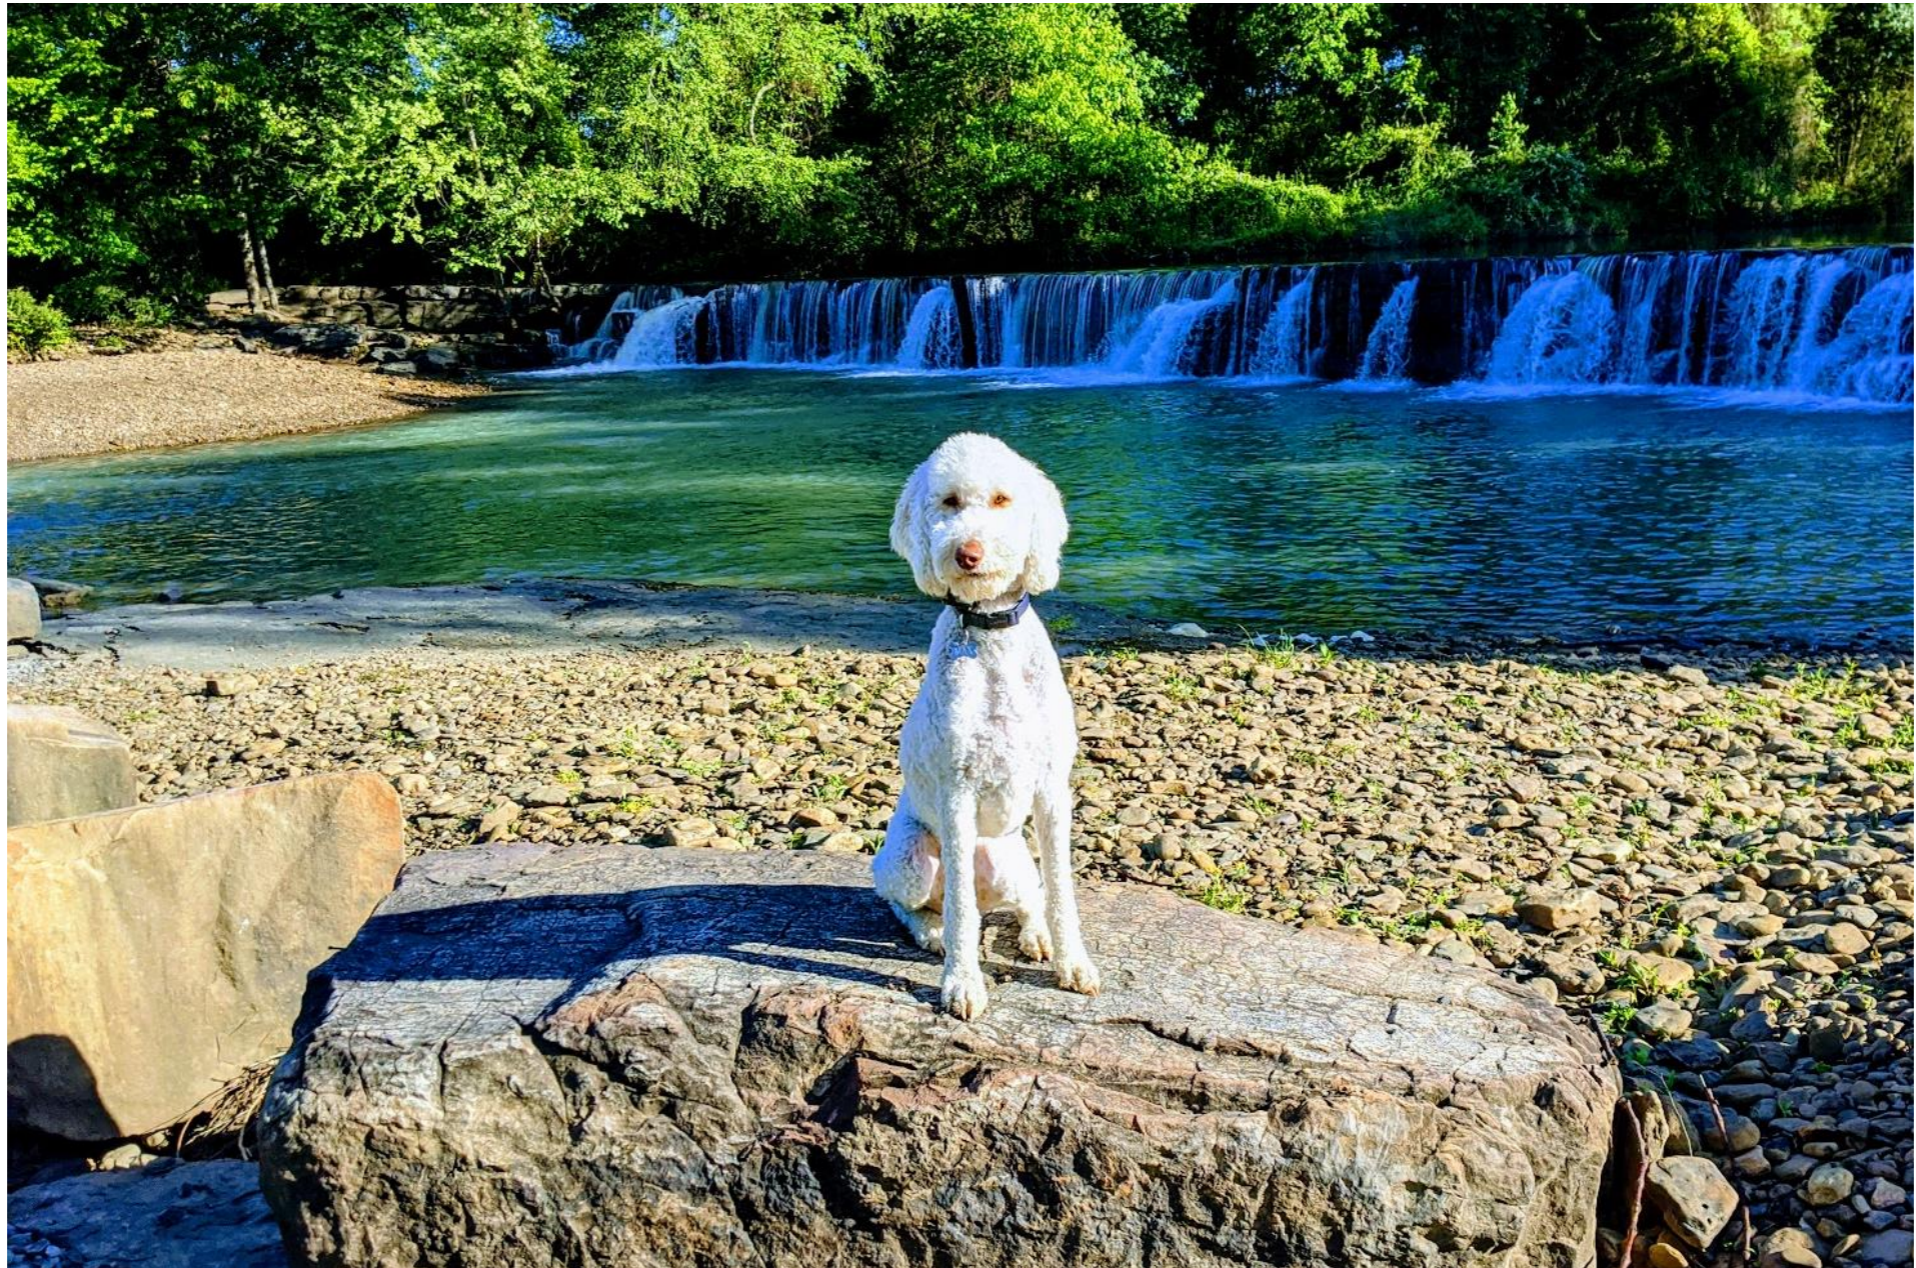

It's a friendly \_\_\_\_\_.

Supplement: Supplementary file 1 [file 26220662]
